# Supplementary material for: Allocating health care resources: a questionnaire experiment on the predictive success of rules
Source: Springer Nature journal article supplement (doi:10.1186/s12939-017-0611-1), 2017-06-26
Supplement: MOESM1 [file 12477286]

# **Allocating Health Care Resources: A Questionnaire Experiment on the Predictive Success of Rules**

Additional file 1: The Questionnaire

Survey in lecture XXX

## **Instructions**

In the following survey, you will face simplified medical decision problems. In each situation, you are asked to allocate treatment time among hypothetical patients. The situations have been constructed for this survey and have no concrete background. There is no right or wrong answer. Of course, the survey is anonymous. Thank you very much for your participation.

Put yourself in the position of a physician. In each of the following decision problems you have a fixed budget of treatment time at your disposal. You can allocate this treatment time among at most two patients. Male and female patients are not distinguished linguistically. In each situation, a new pair of patients and a new time budget is considered.

Suppose that both patients are of the same age and have a life-expectancy of another 20 years. Both patients have different diseases, which harm their health states. The reasons for the diseases are not known.

Irrespective of their health status the patients respond differently to the treatment. Consequently, each unit of treatment time has a different effectivity for both patients. After the elapse of the available time a further improvement of the health states is not possible; the patients remain in their health state reached for the rest of their life.

In each decision situation, the following information is available:

First, the **current health states** are given in points. The health status is measured on a point scale from 0 (i.e. “death”) to 100 (i.e. “perfect health”).

Second, for each patient an **effectivity factor** is stated. The factor measures in points the improvement of health in points which a patient gains from each unit of treatment time obtained. In medical terms, it concerns valuable prognostic information on the treatment success. The factor of a patient remains constant for each unit of time received.

Third, the available **budget of treatment time** is stated in each situation.

To help you with your decision in each situation, allocation proposals are offered. For each proposal, the resulting health gains measured in points are stated. Furthermore, starting from the current health states, for both patients’ health levels achieved after the allocation of time and measured in points are given.

Please tick in each situation the allocation, which most likely corresponds to your preferences. Only if you cannot agree to any of the proposals, we ask you to state your own proposal.

| Situation 1                       | Patient 1 | Patient 2 |
|-----------------------------------|-----------|-----------|
| Current health state              | 40        | 10        |
| Effectivity factor                | 2         | 1         |
| Available units of treatment time | 30        |           |

| Patient                                   | 1   |    | 2  |    | 1  |    | 2  |    | 1  |    | 2  |    | 1  |    | 2 |   | Own proposal |   |
|-------------------------------------------|-----|----|----|----|----|----|----|----|----|----|----|----|----|----|---|---|--------------|---|
|                                           | 1   | 2  | 1  | 2  | 1  | 2  | 1  | 2  | 1  | 2  | 1  | 2  | 1  | 2  | 1 | 2 | 1            | 2 |
| Allocation of time                        | 30  | 0  | 25 | 5  | 20 | 10 | 15 | 15 | 10 | 20 | 5  | 25 | 0  | 30 |   |   |              |   |
| Health gain (in points)                   | 60  | 0  | 50 | 5  | 40 | 10 | 30 | 15 | 20 | 20 | 10 | 25 | 0  | 30 |   |   |              |   |
| Health state after the allocation of time | 100 | 10 | 90 | 15 | 80 | 20 | 70 | 25 | 60 | 30 | 50 | 35 | 40 | 40 |   |   |              |   |
| Your favoured allocation                  | O   |    | O  |    | O  |    | O  |    | O  |    | O  |    | O  |    |   |   |              |   |

| Situation 2                       | Patient 1 | Patient 2 |
|-----------------------------------|-----------|-----------|
| Current health state              | 40        | 10        |
| Effectivity factor                | 2         | 1         |
| Available units of treatment time | 60        |           |

| Patient                                   | 1   |    | 2  |    | 1  |    | 2  |    | 1  |    | 2  |    | 1  |    | 2 |   | Own proposal |   |
|-------------------------------------------|-----|----|----|----|----|----|----|----|----|----|----|----|----|----|---|---|--------------|---|
|                                           | 1   | 2  | 1  | 2  | 1  | 2  | 1  | 2  | 1  | 2  | 1  | 2  | 1  | 2  | 1 | 2 | 1            | 2 |
| Allocation of time                        | 30  | 30 | 25 | 35 | 20 | 40 | 15 | 45 | 10 | 50 | 5  | 55 | 0  | 60 |   |   |              |   |
| Health gain (in points)                   | 60  | 30 | 50 | 35 | 40 | 40 | 30 | 45 | 20 | 50 | 10 | 55 | 0  | 60 |   |   |              |   |
| Health state after the allocation of time | 100 | 40 | 90 | 45 | 80 | 50 | 70 | 55 | 60 | 60 | 50 | 65 | 40 | 70 |   |   |              |   |
| Your favoured allocation                  | O   |    | O  |    | O  |    | O  |    | O  |    | O  |    | O  |    |   |   |              |   |

| Situation 3                       | Patient 1 | Patient 2 |
|-----------------------------------|-----------|-----------|
| Current health state              | 10        | 40        |
| Effectivity factor                | 2         | 1         |
| Available units of treatment time | 30        |           |

| Patient                                   | 1  |    | 2  |    | 1  |    | 2  |    | 1  |    | 2  |    | 1  |    | 2 |  | Own proposal |  |
|-------------------------------------------|----|----|----|----|----|----|----|----|----|----|----|----|----|----|---|--|--------------|--|
|                                           |    |    |    |    |    |    |    |    |    |    |    |    |    |    |   |  |              |  |
| Allocation of time                        | 30 | 0  | 25 | 5  | 20 | 10 | 15 | 15 | 10 | 20 | 5  | 25 | 0  | 30 |   |  |              |  |
| Health gain (in points)                   | 60 | 0  | 50 | 5  | 40 | 10 | 30 | 15 | 20 | 20 | 10 | 25 | 0  | 30 |   |  |              |  |
| Health state after the allocation of time | 70 | 40 | 60 | 45 | 50 | 50 | 40 | 55 | 30 | 60 | 20 | 65 | 10 | 70 |   |  |              |  |
| Your favoured allocation                  | O  |    | O  |    | O  |    | O  |    | O  |    | O  |    | O  |    |   |  |              |  |

| Situation 4                       | Patient 1 | Patient 2 |
|-----------------------------------|-----------|-----------|
| Current health state              | 10        | 40        |
| Effectivity factor                | 2         | 1         |
| Available units of treatment time | 60        |           |

| Patient                                   | 1   |    | 2  |    | 1  |    | 2  |    | 1  |    | 2  |     | 1 |  | 2 |  | Own proposal |  |
|-------------------------------------------|-----|----|----|----|----|----|----|----|----|----|----|-----|---|--|---|--|--------------|--|
|                                           |     |    |    |    |    |    |    |    |    |    |    |     |   |  |   |  |              |  |
| Allocation of time                        | 45  | 15 | 40 | 20 | 30 | 30 | 20 | 40 | 10 | 50 | 0  | 60  |   |  |   |  |              |  |
| Health gain (in points)                   | 90  | 15 | 80 | 20 | 60 | 30 | 40 | 40 | 20 | 50 | 0  | 60  |   |  |   |  |              |  |
| Health state after the allocation of time | 100 | 55 | 90 | 60 | 70 | 70 | 50 | 80 | 30 | 90 | 10 | 100 |   |  |   |  |              |  |
| Your favoured allocation                  | O   |    | O  |    | O  |    | O  |    | O  |    | O  |     |   |  |   |  |              |  |

| Situation 5                       | Patient 1 | Patient 2 |
|-----------------------------------|-----------|-----------|
| Current health state              | 25        | 10        |
| Effectivity factor                | 2         | 1         |
| Available units of treatment time | 30        |           |

| Patient                                   | 1  |    | 2  |    | 1  |    | 2  |    | 1  |    | 2  |    | 1  |    | 2 |  | Own proposal |  |
|-------------------------------------------|----|----|----|----|----|----|----|----|----|----|----|----|----|----|---|--|--------------|--|
|                                           |    |    |    |    |    |    |    |    |    |    |    |    |    |    |   |  |              |  |
| Allocation of time                        | 30 | 0  | 25 | 5  | 20 | 10 | 15 | 15 | 10 | 20 | 5  | 25 | 0  | 30 |   |  |              |  |
| Health gain (in points)                   | 60 | 0  | 50 | 5  | 40 | 10 | 30 | 15 | 20 | 20 | 10 | 25 | 0  | 30 |   |  |              |  |
| Health state after the allocation of time | 85 | 10 | 75 | 15 | 65 | 20 | 55 | 25 | 45 | 30 | 35 | 35 | 25 | 40 |   |  |              |  |
| Your favoured allocation                  | O  |    | O  |    | O  |    | O  |    | O  |    | O  |    | O  |    |   |  |              |  |

| Situation 6                       | Patient 1 | Patient 2 |
|-----------------------------------|-----------|-----------|
| Current health state              | 40        | 25        |
| Effectivity factor                | 2         | 1         |
| Available units of treatment time | 30        |           |

| Patient                                   | 1   |    | 2  |    | 1  |    | 2  |    | 1  |    | 2  |    | 1  |    | 2 |  | Own proposal |  |
|-------------------------------------------|-----|----|----|----|----|----|----|----|----|----|----|----|----|----|---|--|--------------|--|
|                                           |     |    |    |    |    |    |    |    |    |    |    |    |    |    |   |  |              |  |
| Allocation of time                        | 30  | 0  | 25 | 5  | 20 | 10 | 15 | 15 | 10 | 20 | 5  | 25 | 0  | 30 |   |  |              |  |
| Health gain (in points)                   | 60  | 0  | 50 | 5  | 40 | 10 | 30 | 15 | 20 | 20 | 10 | 25 | 0  | 30 |   |  |              |  |
| Health state after the allocation of time | 100 | 25 | 90 | 30 | 80 | 35 | 70 | 40 | 60 | 45 | 50 | 50 | 40 | 55 |   |  |              |  |
| Your favoured allocation                  | O   |    | O  |    | O  |    | O  |    | O  |    | O  |    | O  |    |   |  |              |  |

| Situation 7                       | Patient 1 | Patient 2 |
|-----------------------------------|-----------|-----------|
| Current health state              | 70        | 10        |
| Effectivity factor                | 2         | 1         |
| Available units of treatment time | 30        |           |

| Patient                                   | 1   |    | 2  |    | 1  |    | 2  |    | Own proposal |   |
|-------------------------------------------|-----|----|----|----|----|----|----|----|--------------|---|
|                                           | 1   | 2  | 1  | 2  | 1  | 2  | 1  | 2  | 1            | 2 |
| Allocation of time                        | 15  | 15 | 10 | 20 | 5  | 25 | 0  | 30 |              |   |
| Health gain (in points)                   | 30  | 15 | 20 | 20 | 10 | 25 | 0  | 30 |              |   |
| Health state after the allocation of time | 100 | 25 | 90 | 30 | 80 | 35 | 70 | 40 |              |   |
| Your favoured allocation                  | O   |    | O  |    | O  |    | O  |    |              |   |

| Situation 8                       | Patient 1 | Patient 2 |
|-----------------------------------|-----------|-----------|
| Current health state              | 30        | 15        |
| Effectivity factor                | 2         | 1         |
| Available units of treatment time | 30        |           |

| Patient                                   | 1  |    | 2  |    | 1  |    | 2  |    | 1  |    | 2  |    | Own proposal |    |  |  |
|-------------------------------------------|----|----|----|----|----|----|----|----|----|----|----|----|--------------|----|--|--|
|                                           | 1  | 2  | 1  | 2  | 1  | 2  | 1  | 2  | 1  | 2  | 1  | 2  | 1            | 2  |  |  |
| Allocation of time                        | 30 | 0  | 25 | 5  | 20 | 10 | 15 | 15 | 10 | 20 | 5  | 25 | 0            | 30 |  |  |
| Health gain (in points)                   | 60 | 0  | 50 | 5  | 40 | 10 | 30 | 15 | 20 | 20 | 10 | 25 | 0            | 30 |  |  |
| Health state after the allocation of time | 90 | 15 | 80 | 20 | 70 | 25 | 60 | 30 | 50 | 35 | 40 | 40 | 30           | 45 |  |  |
| Your favoured allocation                  | O  |    | O  |    | O  |    | O  |    | O  |    | O  |    | O            |    |  |  |

| <b>Situation 9</b>                | Patient 1 | Patient 2 |
|-----------------------------------|-----------|-----------|
| Current health state              | 30        | 15        |
| Effectivity factor                | 2         | 1         |
| Available units of treatment time | 60        |           |

| Patient                                   | 1        |    | 2        |    | 1        |    | 2        |    | 1        |    | 2        |    | Own proposal |    |  |  |
|-------------------------------------------|----------|----|----------|----|----------|----|----------|----|----------|----|----------|----|--------------|----|--|--|
|                                           |          |    |          |    |          |    |          |    |          |    |          | 1  | 2            |    |  |  |
| Allocation of time                        | 35       | 25 | 30       | 30 | 25       | 35 | 20       | 40 | 15       | 45 | 10       | 50 | 0            | 60 |  |  |
| Health gain (in points)                   | 70       | 25 | 60       | 30 | 50       | 35 | 40       | 40 | 30       | 45 | 20       | 50 | 0            | 60 |  |  |
| Health state after the allocation of time | 100      | 40 | 90       | 45 | 80       | 50 | 70       | 55 | 60       | 60 | 50       | 65 | 30           | 75 |  |  |
| Your favoured allocation                  | <b>O</b> |    | <b>O</b> |    | <b>O</b> |    | <b>O</b> |    | <b>O</b> |    | <b>O</b> |    | <b>O</b>     |    |  |  |

| <b>Situation 10</b>               | Patient 1 | Patient 2 |
|-----------------------------------|-----------|-----------|
| Current health state              | 40        | 20        |
| Effectivity factor                | 3         | 1         |
| Available units of treatment time | 20        |           |

| Patient                                   | 1        |    | 2        |    | 1        |    | 2        |    | 1        |    | 2 |  | Own proposal |  |
|-------------------------------------------|----------|----|----------|----|----------|----|----------|----|----------|----|---|--|--------------|--|
|                                           |          |    |          |    |          |    |          |    |          |    |   |  |              |  |
| Allocation of time                        | 20       | 0  | 15       | 5  | 10       | 10 | 5        | 15 | 0        | 20 |   |  |              |  |
| Health gain (in points)                   | 60       | 0  | 45       | 5  | 30       | 10 | 15       | 15 | 0        | 20 |   |  |              |  |
| Health state after the allocation of time | 100      | 20 | 85       | 25 | 70       | 30 | 55       | 35 | 40       | 40 |   |  |              |  |
| Your favoured allocation                  | <b>O</b> |    | <b>O</b> |    | <b>O</b> |    | <b>O</b> |    | <b>O</b> |    |   |  |              |  |

| <b>Situation 11</b>               | Patient 1 | Patient 2 |
|-----------------------------------|-----------|-----------|
| Current health state              | 40        | 20        |
| Effectivity factor                | 3         | 1         |
| Available units of treatment time | 40        |           |

| Patient                                   | 1        |    | 2        |    | 1        |    | 2        |    | 1        |    | 2 |   | Individual proposal |   |
|-------------------------------------------|----------|----|----------|----|----------|----|----------|----|----------|----|---|---|---------------------|---|
|                                           | 1        | 2  | 1        | 2  | 1        | 2  | 1        | 2  | 1        | 2  | 1 | 2 | 1                   | 2 |
| Allocation of time                        | 20       | 20 | 15       | 25 | 10       | 30 | 5        | 35 | 0        | 40 |   |   |                     |   |
| Health gain (in points)                   | 60       | 20 | 45       | 25 | 30       | 30 | 15       | 35 | 0        | 40 |   |   |                     |   |
| Health state after the allocation of time | 100      | 40 | 85       | 45 | 70       | 50 | 55       | 55 | 40       | 60 |   |   |                     |   |
| Your favoured allocation                  | <b>O</b> |    | <b>O</b> |    | <b>O</b> |    | <b>O</b> |    | <b>O</b> |    |   |   |                     |   |

| <b>Situation 12</b>               | Patient 1 | Patient 2 |
|-----------------------------------|-----------|-----------|
| Current health state              | 20        | 40        |
| Effectivity factor                | 3         | 1         |
| Available units of treatment time | 20        |           |

| Patient                                   | 1        |    | 2        |    | 1        |    | 2        |    | 1        |    | 2 |   | Own proposal |   |
|-------------------------------------------|----------|----|----------|----|----------|----|----------|----|----------|----|---|---|--------------|---|
|                                           | 1        | 2  | 1        | 2  | 1        | 2  | 1        | 2  | 1        | 2  | 1 | 2 | 1            | 2 |
| Allocation of time                        | 20       | 0  | 15       | 5  | 10       | 10 | 5        | 15 | 0        | 20 |   |   |              |   |
| Health gain (in points)                   | 60       | 0  | 45       | 5  | 30       | 10 | 15       | 15 | 0        | 20 |   |   |              |   |
| Health state after the allocation of time | 80       | 40 | 65       | 45 | 50       | 50 | 35       | 55 | 20       | 60 |   |   |              |   |
| Your favoured allocation                  | <b>O</b> |    | <b>O</b> |    | <b>O</b> |    | <b>O</b> |    | <b>O</b> |    |   |   |              |   |

| <b>Situation 13</b>               | Patient 1 | Patient 2 |
|-----------------------------------|-----------|-----------|
| Current health state              | 25        | 5         |
| Effectivity factor                | 3         | 1         |
| Available units of treatment time | 20        |           |

| Patient                                   | 1        |   | 2        |    | 1        |    | 2        |    | 1        |    | 2 |   | Own proposal |   |
|-------------------------------------------|----------|---|----------|----|----------|----|----------|----|----------|----|---|---|--------------|---|
|                                           | 1        | 2 | 1        | 2  | 1        | 2  | 1        | 2  | 1        | 2  | 1 | 2 | 1            | 2 |
| Allocation of time                        | 20       | 0 | 15       | 5  | 10       | 10 | 5        | 15 | 0        | 20 |   |   |              |   |
| Health gain (in points)                   | 60       | 0 | 45       | 5  | 30       | 10 | 15       | 15 | 0        | 20 |   |   |              |   |
| Health state after the allocation of time | 85       | 5 | 70       | 10 | 55       | 15 | 40       | 20 | 25       | 25 |   |   |              |   |
| Your favoured allocation                  | <b>O</b> |   | <b>O</b> |    | <b>O</b> |    | <b>O</b> |    | <b>O</b> |    |   |   |              |   |

| <b>Situation 14</b>               | Patient 1 | Patient 2 |
|-----------------------------------|-----------|-----------|
| Current health state              | 25        | 5         |
| Effectivity factor                | 3         | 1         |
| Available units of treatment time | 40        |           |

| Patient                                   | 1        |    | 2        |    | 1        |    | 2        |    | 1        |    | 2        |    | Own proposal |   |
|-------------------------------------------|----------|----|----------|----|----------|----|----------|----|----------|----|----------|----|--------------|---|
|                                           | 1        | 2  | 1        | 2  | 1        | 2  | 1        | 2  | 1        | 2  | 1        | 2  | 1            | 2 |
| Allocation of time                        | 25       | 15 | 20       | 20 | 15       | 25 | 10       | 30 | 5        | 35 | 0        | 40 |              |   |
| Health gain (in points)                   | 75       | 15 | 60       | 20 | 45       | 25 | 30       | 30 | 15       | 35 | 0        | 40 |              |   |
| Health state after the allocation of time | 100      | 20 | 85       | 25 | 70       | 30 | 55       | 35 | 40       | 40 | 25       | 45 |              |   |
| Your favoured allocation                  | <b>O</b> |    | <b>O</b> |    | <b>O</b> |    | <b>O</b> |    | <b>O</b> |    | <b>O</b> |    |              |   |



| <b>Situation 15</b>               | Patient 1 | Patient 2 |
|-----------------------------------|-----------|-----------|
| Current health state              | 55        | 15        |
| Effectivity factor                | 3         | 1         |
| Available units of treatment time | 20        |           |

| Patient                                   | 1   |    | 2  |    | 1  |    | 2  |    | Own proposal |   |
|-------------------------------------------|-----|----|----|----|----|----|----|----|--------------|---|
|                                           |     |    |    |    |    |    |    |    | 1            | 2 |
| Allocation of time                        | 15  | 5  | 10 | 10 | 5  | 15 | 0  | 20 |              |   |
| Health gain (in points)                   | 45  | 5  | 30 | 10 | 15 | 15 | 0  | 20 |              |   |
| Health state after the allocation of time | 100 | 20 | 85 | 25 | 70 | 30 | 55 | 35 |              |   |
| Your favoured allocation                  | O   |    | O  |    | O  |    | O  |    |              |   |

| <b>Situation 16</b>               | Patient 1 | Patient 2 |
|-----------------------------------|-----------|-----------|
| Current health state              | 55        | 15        |
| Effectivity factor                | 3         | 1         |
| Available units of treatment time | 40        |           |

| Patient                                   | 1   |    | 2  |    | 1  |    | 2  |    | Own proposal |   |
|-------------------------------------------|-----|----|----|----|----|----|----|----|--------------|---|
|                                           |     |    |    |    |    |    |    |    | 1            | 2 |
| Allocation of time                        | 15  | 25 | 10 | 30 | 5  | 35 | 0  | 40 |              |   |
| Health gain (in points)                   | 45  | 25 | 30 | 30 | 15 | 35 | 0  | 40 |              |   |
| Health state after the allocation of time | 100 | 40 | 85 | 45 | 70 | 50 | 55 | 55 |              |   |
| Your favoured allocation                  | O   |    | O  |    | O  |    | O  |    |              |   |

Please describe briefly how you proceeded in general when making your decisions in the different situations. On which information did you focus in particular? Did you try to reach a certain goal with your allocations? Did you develop a rule for your decisions, and if yes, how would you describe this rule?
