# Supplementary material for: Allocating health care resources: a questionnaire experiment on the predictive success of rules
Source: Springer Nature journal article supplement (doi:10.1186/s12939-017-0611-1), 2017-06-26
Supplement: MOESM3 [file 12477286]

## **Allocating Health Care Resources: A Questionnaire Experiment on the Predictive Success of Rules**

### Additional file 3: Supplements to Tables S4 to S6 in Additional file 2

This file contains further details on the calculation of hit rates and areas of prediction for each pair of situations in Tables S4 to S6.

Tables S4.a to S4.f: Supplements to Table S4: Weak and strong resource monotonicity, in Additional file 2

Tables S5.a to S5.d: Supplements to Table S5: Weak and strong severity monotonicity, in Additional file 2

Tables S6.a and S6.b: Supplements to Table S6: Effectiveness monotonicity, in Additional file 2

**Table S4.a:** Pairs of allocations fulfilling weak and/or strong resource monotonicity – Situations 1 and 2

|                                                                               |         | Situation 2 ( $S_1 = 40, S_2 = 10, e_1:e_2 = 2:1, q = 60$ ) |         |         |         |         |        |        |         |
|-------------------------------------------------------------------------------|---------|-------------------------------------------------------------|---------|---------|---------|---------|--------|--------|---------|
| Allocations offered                                                           |         | (30,30)                                                     | (25,35) | (20,40) | (15,45) | (10,50) | (5,55) | (0,60) | Sum     |
| Situation 1<br>( $S_1 = 40,$<br>$S_2 = 10,$<br>$e_1:e_2 = 2:1,$<br>$q = 30$ ) | (30,0)  | 3                                                           | 1       | 3       | 1       | 1       | 0      | 0      | 9       |
|                                                                               | (25,5)  | 1                                                           | 0       | 1       | 0       | 0       | 0      | 0      | 2       |
|                                                                               | (20,10) | 3                                                           | 4       | 8       | 2       | 1       | 0      | 0      | 18      |
|                                                                               | (15,15) | 8                                                           | 6       | 13      | 6       | 0       | 0      | 0      | 33      |
|                                                                               | (10,20) | 1                                                           | 2       | 35      | 21      | 12      | 1      | 0      | 72      |
|                                                                               | (5,25)  | 1                                                           | 1       | 4       | 8       | 11      | 1      | 0      | 26      |
|                                                                               | (0,30)  | 0                                                           | 0       | 0       | 0       | 2       | 0      | 0      | 2       |
| Sum                                                                           |         | 17                                                          | 14      | 64      | 38      | 27      | 2      | 0      | N = 162 |

Note:  $S_1, S_2$ , status quo health levels of patients 1 and 2;  $e_1, e_2$ , effectiveness factors of patients 1 and 2;  $q$ , available units of treatment time.

Situations 1 and 2: Calculation of hit rates and areas of prediction

|                              | # hits | Hit rate ( $r = \frac{\#hits}{N}$ ) | Area of prediction ( $a$ ) | Measure of predictive success ( $m = r - a$ ) |
|------------------------------|--------|-------------------------------------|----------------------------|-----------------------------------------------|
| Weak resource monotonicity   | 151    | 0.9321                              | $28/49 = 0.5714$           | 0.3607                                        |
| Strong resource monotonicity | 121    | 0.7469                              | $20/49 = 0.4082$           | 0.3388                                        |

**Table S4.b:** Pairs of allocations fulfilling weak and/or strong resource monotonicity – Situations 3 and 4

|                                                                                 |         | Situation 4 ( $S_1 = 10, S_2 = 40, e_1:e_2 = 2:1, q = 60$ ) |         |         |         |         |        |         |
|---------------------------------------------------------------------------------|---------|-------------------------------------------------------------|---------|---------|---------|---------|--------|---------|
| Allocations offered                                                             |         | (45,15)                                                     | (40,20) | (30,30) | (20,40) | (10,50) | (0,60) | Sum     |
| Situation 3<br>( $S_1 = 10,$<br>$S_2 = 40,$<br>$e_1 : e_2 = 2:1,$<br>$q = 30$ ) | (30,0)  | 1                                                           | 2       | 1       | 0       | 0       | 0      | 4       |
|                                                                                 | (25,5)  | 2                                                           | 3       | 6       | 1       | 0       | 0      | 12      |
|                                                                                 | (20,10) | 1                                                           | 12      | 49      | 5       | 0       | 0      | 67      |
|                                                                                 | (15,15) | 0                                                           | 1       | 28      | 6       | 0       | 0      | 35      |
|                                                                                 | (10,20) | 1                                                           | 2       | 9       | 27      | 1       | 0      | 40      |
|                                                                                 | (5,25)  | 0                                                           | 0       | 0       | 1       | 0       | 0      | 1       |
|                                                                                 | (0,30)  | 0                                                           | 0       | 1       | 0       | 0       | 0      | 1       |
| Sum                                                                             |         | 5                                                           | 20      | 94      | 40      | 1       | 0      | N = 160 |

Note:  $S_1, S_2$ , status quo health levels of patients 1 and 2;  $e_1, e_2$ , effectiveness factors of patients 1 and 2;  $q$ , available units of treatment time.

Situations 3 and 4: Calculation of hit rates and areas of prediction

|                              | # hits | Hit rate ( $r = \frac{\#hits}{N}$ ) | Area of prediction ( $a$ ) | Measure of predictive success ( $m = r - a$ ) |
|------------------------------|--------|-------------------------------------|----------------------------|-----------------------------------------------|
| Weak resource monotonicity   | 158    | 0.9875                              | $25/42 = 0.5952$           | 0.3923                                        |
| Strong resource monotonicity | 148    | 0.9250                              | $18/42 = 0.4286$           | 0.4964                                        |

**Table S4.c:** Pairs of allocations fulfilling weak and/or strong resource monotonicity – Situations 8 and 9

|                                                                               |         | Situation 9 ( $S_1 = 30, S_2 = 15, e_1:e_2 = 2:1, q = 60$ ) |         |         |         |         |         |        |         |
|-------------------------------------------------------------------------------|---------|-------------------------------------------------------------|---------|---------|---------|---------|---------|--------|---------|
| Allocations offered                                                           |         | (35,25)                                                     | (30,30) | (25,35) | (20,40) | (15,45) | (10,50) | (0,60) | Sum     |
| Situation 8<br>( $S_1 = 30,$<br>$S_2 = 15,$<br>$e_1:e_2 = 2:1,$<br>$q = 30$ ) | (30,0)  | 1                                                           | 0       | 1       | 0       | 0       | 0       | 0      | 2       |
|                                                                               | (25,5)  | 0                                                           | 0       | 4       | 0       | 0       | 0       | 0      | 4       |
|                                                                               | (20,10) | 3                                                           | 4       | 5       | 1       | 0       | 0       | 0      | 13      |
|                                                                               | (15,15) | 5                                                           | 12      | 22      | 18      | 3       | 0       | 0      | 60      |
|                                                                               | (10,20) | 1                                                           | 2       | 6       | 39      | 15      | 1       | 0      | 64      |
|                                                                               | (5,25)  | 0                                                           | 0       | 1       | 4       | 12      | 1       | 0      | 18      |
|                                                                               | (0,30)  | 0                                                           | 0       | 0       | 0       | 0       | 0       | 0      | 0       |
| Sum                                                                           |         | 10                                                          | 18      | 39      | 62      | 30      | 2       | 0      | N = 161 |

Note:  $S_1, S_2$ , status quo health levels of patients 1 and 2;  $e_1, e_2$ , effectiveness factors of patients 1 and 2;  $q$ , available units of treatment time.

Situations 8 and 9: Calculation of hit rates and areas of prediction

|                              | # hits | Hit rate ( $r = \frac{\#hits}{N}$ ) | Area of prediction ( $a$ ) | Measure of predictive success ( $m = r - a$ ) |
|------------------------------|--------|-------------------------------------|----------------------------|-----------------------------------------------|
| Weak resource monotonicity   | 160    | 0.9938                              | $32/49 = 0.6531$           | 0.3407                                        |
| Strong resource monotonicity | 151    | 0.9379                              | $24/49 = 0.4898$           | 0.4481                                        |

**Table S4.d:** Pairs of allocations fulfilling weak and/or strong resource monotonicity – Situations 10 and 11

|                                                                                |         | Situation 11 ( $S_1 = 40, S_2 = 20, e_1:e_2 = 3:1, q = 40$ ) |         |         |        |        |         |
|--------------------------------------------------------------------------------|---------|--------------------------------------------------------------|---------|---------|--------|--------|---------|
| Allocations offered                                                            |         | (20,20)                                                      | (15,25) | (10,30) | (5,35) | (0,40) | Sum     |
| Situation 10<br>( $S_1 = 40,$<br>$S_2 = 20,$<br>$e_1:e_2 = 3:1,$<br>$q = 20$ ) | (20,0)  | 3                                                            | 4       | 1       | 0      | 0      | 8       |
|                                                                                | (15,5)  | 10                                                           | 9       | 2       | 0      | 0      | 21      |
|                                                                                | (10,10) | 9                                                            | 21      | 26      | 1      | 0      | 57      |
|                                                                                | (5,15)  | 3                                                            | 4       | 45      | 18     | 0      | 70      |
|                                                                                | (0,20)  | 0                                                            | 0       | 0       | 3      | 0      | 3       |
| Sum                                                                            |         | 25                                                           | 38      | 74      | 22     | 0      | N = 159 |

Note:  $S_1, S_2$ , status quo health levels of patients 1 and 2;  $e_1, e_2$ , effectiveness factors of patients 1 and 2;  $q$ , available units of treatment time.

Situations 10 and 11: Calculation of hit rates and areas of prediction

|                              | # hits | Hit rate ( $r = \frac{\#hits}{N}$ ) | Area of prediction ( $a$ ) | Measure of predictive success ( $m = r - a$ ) |
|------------------------------|--------|-------------------------------------|----------------------------|-----------------------------------------------|
| Weak resource monotonicity   | 151    | 0.9497                              | $15/25 = 0.6000$           | 0.3497                                        |
| Strong resource monotonicity | 95     | 0.5975                              | $9/25 = 0.3600$            | 0.2375                                        |

**Table S4.e:** Pairs of allocations fulfilling weak and/or strong resource monotonicity – Situations 13 and 14

|                                                                               |         | Situation 14 ( $S_1 = 25, S_2 = 5, e_1:e_2 = 3:1, q = 40$ ) |         |         |         |        |        |         |
|-------------------------------------------------------------------------------|---------|-------------------------------------------------------------|---------|---------|---------|--------|--------|---------|
| Allocations offered                                                           |         | (25,15)                                                     | (20,20) | (15,25) | (10,30) | (5,35) | (0,40) | Sum     |
| Situation 13<br>( $S_1 = 25,$<br>$S_2 = 5,$<br>$e_1:e_2 = 3:1,$<br>$q = 20$ ) | (20,0)  | 7                                                           | 4       | 5       | 4       | 1      | 0      | 21      |
|                                                                               | (15,5)  | 3                                                           | 11      | 6       | 2       | 2      | 0      | 24      |
|                                                                               | (10,10) | 4                                                           | 17      | 5       | 5       | 2      | 0      | 33      |
|                                                                               | (5,15)  | 3                                                           | 3       | 8       | 52      | 12     | 0      | 78      |
|                                                                               | (0,20)  | 0                                                           | 0       | 0       | 2       | 3      | 0      | 5       |
| Sum                                                                           |         | 17                                                          | 35      | 24      | 65      | 20     | 0      | N = 161 |

Note:  $S_1, S_2$ , status quo health levels of patients 1 and 2;  $e_1, e_2$ , effectiveness factors of patients 1 and 2;  $q$ , available units of treatment time.

Situations 13 and 14: Calculation of hit rates and areas of prediction

|                              | # hits | Hit rate ( $r = \frac{\#hits}{N}$ ) | Area of prediction ( $a$ ) | Measure of predictive success ( $m = r - a$ ) |
|------------------------------|--------|-------------------------------------|----------------------------|-----------------------------------------------|
| Weak resource monotonicity   | 145    | 0.9006                              | $19/30 = 0.6333$           | 0.2673                                        |
| Strong resource monotonicity | 115    | 0.7143                              | $12/30 = 0.4000$           | 0.3143                                        |

**Table S4.f:** Pairs of allocations fulfilling weak and/or strong resource monotonicity – Situations 15 and 16

|                                                              |         | Situation 16 ( $S_1 = 55, S_2 = 15, e_1:e_2 = 3:1, q = 40$ ) |         |        |        |         |
|--------------------------------------------------------------|---------|--------------------------------------------------------------|---------|--------|--------|---------|
| Allocations offered                                          |         | (15,25)                                                      | (10,30) | (5,35) | (0,40) | Sum     |
| Situation 15                                                 | (15,5)  | 8                                                            | 1       | 0      | 0      | 9       |
| $(S_1 = 55,$<br>$S_2 = 15,$<br>$e_1:e_2 = 3:1,$<br>$q = 20)$ | (10,10) | 15                                                           | 14      | 7      | 1      | 37      |
|                                                              | (5,15)  | 8                                                            | 38      | 54     | 1      | 101     |
|                                                              | (0,20)  | 0                                                            | 4       | 8      | 2      | 14      |
| Sum                                                          |         | 31                                                           | 57      | 69     | 4      | N = 161 |

Note:  $S_1, S_2$ , status quo health levels of patients 1 and 2;  $e_1, e_2$ , effectiveness factors of patients 1 and 2;  $q$ , available units of treatment time.

Situations 15 and 16: Calculation of hit rates and areas of prediction

|                              | # hits | Hit rate ( $r = \frac{\#hits}{N}$ ) | Area of prediction ( $a$ ) | Measure of predictive success ( $m = r - a$ ) |
|------------------------------|--------|-------------------------------------|----------------------------|-----------------------------------------------|
| Weak resource monotonicity   | 151    | 0.9379                              | $10/16 = 0.6250$           | 0.3129                                        |
| Strong resource monotonicity | 73     | 0.4534                              | $6/16 = 0.3750$            | 0.0784                                        |

**Table S5.a:** Pairs of allocations fulfilling weak and/or strong severity monotonicity – Situations 1 and 5

|                                                                               |         | Situation 5 ( $S_1 = 25, S_2 = 10, e_1:e_2 = 2:1, q = 30$ ) |        |         |         |         |        |        |         |
|-------------------------------------------------------------------------------|---------|-------------------------------------------------------------|--------|---------|---------|---------|--------|--------|---------|
| Allocations offered                                                           |         | (30,0)                                                      | (25,5) | (20,10) | (15,15) | (10,20) | (5,25) | (0,30) | Sum     |
| Situation 1<br>( $S_1 = 40,$<br>$S_2 = 10,$<br>$e_1:e_2 = 2:1,$<br>$q = 30$ ) | (30,0)  | 3                                                           | 0      | 0       | 3       | 3       | 0      | 0      | 9       |
|                                                                               | (25,5)  | 0                                                           | 0      | 1       | 0       | 0       | 1      | 0      | 2       |
|                                                                               | (20,10) | 1                                                           | 3      | 5       | 3       | 6       | 0      | 0      | 18      |
|                                                                               | (15,15) | 1                                                           | 3      | 6       | 13      | 9       | 1      | 0      | 33      |
|                                                                               | (10,20) | 0                                                           | 2      | 4       | 12      | 48      | 5      | 0      | 71      |
|                                                                               | (5,25)  | 0                                                           | 0      | 0       | 3       | 17      | 6      | 0      | 26      |
|                                                                               | (0,30)  | 0                                                           | 0      | 0       | 0       | 1       | 1      | 0      | 2       |
| Sum                                                                           |         | 5                                                           | 8      | 16      | 34      | 84      | 14     | 14     | N = 161 |

Note:  $S_1, S_2$ , status quo health levels of patients 1 and 2;  $e_1, e_2$ , effectiveness factors of patients 1 and 2;  $q$ , available units of treatment time.

Situations 1 and 5: Calculation of hit rates and areas of prediction

|                                    | # hits | Hit rate ( $r = \frac{\#hits}{N}$ ) | Area of prediction ( $a$ ) | Measure of predictive success ( $m = r - a$ ) |
|------------------------------------|--------|-------------------------------------|----------------------------|-----------------------------------------------|
| Weak severity monotonicity         | 129    | 0.8012                              | $28/49 = 0.5714$           | 0.2298                                        |
| Strong severity monotonicity       | 54     | 0.3354                              | $21/49 = 0.4286$           | -0.0932                                       |
| Contextual irrelevance of severity | 75     | 0.4658                              | $7/49 = 0.1429$            | 0.3230                                        |



**Table S5.b:** Pairs of allocations fulfilling weak and/or strong severity monotonicity – Situations 1 and 6

|                                                                               |         | Situation 6 ( $S_1 = 40, S_2 = 25, e_1:e_2 = 2:1, q = 30$ ) |        |         |         |         |        |        |         |
|-------------------------------------------------------------------------------|---------|-------------------------------------------------------------|--------|---------|---------|---------|--------|--------|---------|
| Allocations offered                                                           |         | (30,0)                                                      | (25,5) | (20,10) | (15,15) | (10,20) | (5,25) | (0,30) | Sum     |
| Situation 1<br>( $S_1 = 40,$<br>$S_2 = 10,$<br>$e_1:e_2 = 2:1,$<br>$q = 30$ ) | (30,0)  | 2                                                           | 0      | 1       | 3       | 2       | 1      | 0      | 9       |
|                                                                               | (25,5)  | 0                                                           | 0      | 1       | 0       | 0       | 1      | 0      | 2       |
|                                                                               | (20,10) | 0                                                           | 0      | 4       | 9       | 4       | 1      | 0      | 18      |
|                                                                               | (15,15) | 0                                                           | 1      | 3       | 21      | 7       | 1      | 0      | 33      |
|                                                                               | (10,20) | 0                                                           | 2      | 2       | 20      | 40      | 8      | 0      | 72      |
|                                                                               | (5,25)  | 0                                                           | 0      | 0       | 5       | 13      | 8      | 0      | 26      |
|                                                                               | (0,30)  | 0                                                           | 0      | 0       | 0       | 1       | 1      | 0      | 2       |
| Sum                                                                           |         | 2                                                           | 3      | 11      | 58      | 67      | 21     | 0      | N = 162 |

Note:  $S_1, S_2$ , status quo health levels of patients 1 and 2;  $e_1, e_2$ , effectiveness factors of patients 1 and 2;  $q$ , available units of treatment time.

Situations 1 and 6: Calculation of hit rates and areas of prediction

|                                    | # hits | Hit rate ( $r = \frac{\#hits}{N}$ ) | Area of prediction ( $a$ ) | Measure of predictive success ( $m = r - a$ ) |
|------------------------------------|--------|-------------------------------------|----------------------------|-----------------------------------------------|
| Weak severity monotonicity         | 123    | 0.7593                              | $28/49 = 0.5714$           | 0.1878                                        |
| Strong severity monotonicity       | 48     | 0.2963                              | $21/49 = 0.4286$           | -0.1323                                       |
| Contextual irrelevance of severity | 75     | 0.4630                              | $7/49 = 0.1429$            | 0.3201                                        |

**Table S5.c:** Pairs of allocations fulfilling weak and/or strong severity monotonicity – Situations 1 and 7

|                                                                               |                     | Situation 7 ( $S_1 = 70, S_2 = 10, e_1:e_2 = 2:1, q = 30$ ) |         |        |        | Sum     |
|-------------------------------------------------------------------------------|---------------------|-------------------------------------------------------------|---------|--------|--------|---------|
|                                                                               |                     | (15,15)                                                     | (10,20) | (5,25) | (0,30) |         |
| Situation 1<br>( $S_1 = 40,$<br>$S_2 = 10,$<br>$e_1:e_2 = 2:1,$<br>$q = 30$ ) | Allocations offered |                                                             |         |        |        |         |
|                                                                               | (30,0)              | 3                                                           | 1       | 3      | 2      | 9       |
|                                                                               | (25,5)              | 0                                                           | 1       | 1      | 0      | 2       |
|                                                                               | (20,10)             | 0                                                           | 8       | 5      | 5      | 18      |
|                                                                               | (15,15)             | 7                                                           | 12      | 12     | 2      | 33      |
|                                                                               | (10,20)             | 3                                                           | 19      | 33     | 17     | 72      |
|                                                                               | (5,25)              | 0                                                           | 3       | 15     | 8      | 26      |
| (0,30)                                                                        | 0                   | 0                                                           | 1       | 1      | 2      |         |
|                                                                               | Sum                 | 13                                                          | 44      | 70     | 35     | N = 162 |

Note:  $S_1, S_2$ , status quo health levels of patients 1 and 2;  $e_1, e_2$ , effectiveness factors of patients 1 and 2;  $q$ , available units of treatment time.

Situations 1 and 7: Calculation of hit rates and areas of prediction

|                                    | # hits | Hit rate ( $r = \frac{\#hits}{N}$ ) | Area of prediction ( $a$ ) | Measure of predictive success ( $m = r - a$ ) |
|------------------------------------|--------|-------------------------------------|----------------------------|-----------------------------------------------|
| Weak severity monotonicity         | 155    | 0.9568                              | $22/28 = 0.7857$           | 0.1711                                        |
| Strong severity monotonicity       | 113    | 0.6975                              | $18/28 = 0.6429$           | 0.0547                                        |
| Contextual irrelevance of severity | 42     | 0.2593                              | $4/28 = 0.1429$            | 0.1164                                        |

**Table S5.d:** Pairs of allocations fulfilling weak and/or strong severity monotonicity – Situations 5 and 7

|                                                                               |                     | Situation 7 ( $S_1 = 70, S_2 = 10, e_1:e_2 = 2:1, q = 30$ ) |         |        |        | Sum |
|-------------------------------------------------------------------------------|---------------------|-------------------------------------------------------------|---------|--------|--------|-----|
|                                                                               |                     | (15,15)                                                     | (10,20) | (5,25) | (0,30) |     |
| Situation 5<br>( $S_1 = 25,$<br>$S_2 = 10,$<br>$e_1:e_2 = 2:1,$<br>$q = 30$ ) | Allocations offered |                                                             |         |        |        |     |
|                                                                               | (30,0)              | 1                                                           | 2       | 1      | 1      | 5   |
|                                                                               | (25,5)              | 0                                                           | 3       | 3      | 2      | 8   |
|                                                                               | (20,10)             | 4                                                           | 5       | 3      | 4      | 16  |
|                                                                               | (15,15)             | 3                                                           | 10      | 17     | 4      | 34  |
|                                                                               | (10,20)             | 4                                                           | 23      | 40     | 17     | 84  |
|                                                                               | (5,25)              | 1                                                           | 1       | 6      | 6      | 14  |
|                                                                               | (0,30)              | 0                                                           | 0       | 0      | 0      | 0   |
|                                                                               | Sum                 | 13                                                          | 44      | 70     | 34     | 161 |

Note:  $S_1, S_2$ , status quo health levels of patients 1 and 2;  $e_1, e_2$ , effectiveness factors of patients 1 and 2;  $q$ , available units of treatment time.

Situations 5 and 7: Calculation of hit rates and areas of prediction

|                                    | # hits | Hit rate ( $r = \frac{\#hits}{N}$ ) | Area of prediction ( $a$ ) | Measure of predictive success ( $m = r - a$ ) |
|------------------------------------|--------|-------------------------------------|----------------------------|-----------------------------------------------|
| Weak severity monotonicity         | 155    | 0.9627                              | $22/28 = 0.7857$           | 0.1770                                        |
| Strong severity monotonicity       | 123    | 0.7640                              | $18/28 = 0.6429$           | 0.1211                                        |
| Contextual irrelevance of severity | 32     | 0.1988                              | $4/28 = 0.1429$            | 0.0559                                        |

**Table S6.a:** Pairs of allocations fulfilling effectiveness monotonicity – Situations 1 and 3

|                                                                                                                                                    |         | Situation 3 ( $S_1 = 10, S_2 = 40, e_1:e_2 = 2:1, q = 30$ ) ( <i>relevant is patient 2: <math>S_2 = 40, e_2 = 1</math></i> ) |        |         |         |         |        |        |         |
|----------------------------------------------------------------------------------------------------------------------------------------------------|---------|------------------------------------------------------------------------------------------------------------------------------|--------|---------|---------|---------|--------|--------|---------|
| Allocations offered                                                                                                                                |         | (30,0)                                                                                                                       | (25,5) | (20,10) | (15,15) | (10,20) | (5,25) | (0,30) | Sum     |
| Situation 1<br>( $S_1 = 40,$<br>$S_2 = 10,$<br>$e_1:e_2 = 2:1,$<br>$q = 30$ )<br><br>( <i>relevant is patient 1:</i><br>$S_1 = 40,$<br>$e_1 = 2$ ) | (30,0)  | 3                                                                                                                            | 0      | 4       | 2       | 0       | 0      | 0      | 9       |
|                                                                                                                                                    | (25,5)  | 0                                                                                                                            | 0      | 2       | 0       | 0       | 0      | 0      | 2       |
|                                                                                                                                                    | (20,10) | 0                                                                                                                            | 2      | 9       | 3       | 4       | 0      | 0      | 18      |
|                                                                                                                                                    | (15,15) | 0                                                                                                                            | 4      | 7       | 9       | 11      | 1      | 1      | 33      |
|                                                                                                                                                    | (10,20) | 1                                                                                                                            | 4      | 28      | 17      | 22      | 0      | 0      | 72      |
|                                                                                                                                                    | (5,25)  | 0                                                                                                                            | 2      | 16      | 5       | 3       | 0      | 0      | 26      |
|                                                                                                                                                    | (0,30)  | 0                                                                                                                            | 0      | 2       | 0       | 0       | 0      | 0      | 2       |
| Sum                                                                                                                                                |         | 4                                                                                                                            | 12     | 68      | 36      | 40      | 1      | 1      | N = 162 |

Note:  $S_1, S_2$ , status quo health levels of patients 1 and 2;  $e_1, e_2$ , effectiveness factors of patients 1 and 2;  $q$ , available units of treatment time.

Situations 1 and 3: Calculation of hit rates and areas of prediction

|                                         | # hits | Hit rate ( $r = \frac{\#hits}{N}$ ) | Area of prediction ( $a$ ) | Measure of predictive success ( $m = r - a$ ) |
|-----------------------------------------|--------|-------------------------------------|----------------------------|-----------------------------------------------|
| Focus on lower effectiveness            | 78     | 0.4815                              | 21/49 = 0.4286             | 0.0529                                        |
| Focus on stronger effectiveness         | 41     | 0.2531                              | 21/49 = 0.4286             | -0.1755                                       |
| Contextual irrelevance of effectiveness | 43     | 0.2654                              | 7/49 = 0.1429              | 0.1226                                        |

**Table S6.b:** Pairs of allocations fulfilling effectiveness monotonicity – Situations 10 and 12

|                                                                                                                                                                             |         | Situation 12 ( $S_1 = 20, S_2 = 40, e_1:e_2 = 3:1, q = 20$ )<br>( <i>relevant is patient 2: <math>S_2 = 40, e_2 = 1</math></i> ) |         |         |         |         |         |
|-----------------------------------------------------------------------------------------------------------------------------------------------------------------------------|---------|----------------------------------------------------------------------------------------------------------------------------------|---------|---------|---------|---------|---------|
| Allocations offered                                                                                                                                                         |         | (35,25)                                                                                                                          | (30,30) | (25,35) | (20,40) | (15,45) | Sum     |
| Situation 10<br>( $S_1 = 40,$<br>$S_2 = 20,$<br>$e_1:e_2 = 3:1,$<br>$q = 20$ )<br><br>( <i>relevant is patient 1:<br/><math>S_1 = 40,</math><br/><math>e_1 = 3</math></i> ) | (20,10) | 3                                                                                                                                | 3       | 2       | 0       | 0       | 8       |
|                                                                                                                                                                             | (15,15) | 3                                                                                                                                | 9       | 7       | 1       | 1       | 21      |
|                                                                                                                                                                             | (10,20) | 1                                                                                                                                | 12      | 36      | 9       | 0       | 58      |
|                                                                                                                                                                             | (5,25)  | 1                                                                                                                                | 7       | 41      | 21      | 0       | 70      |
|                                                                                                                                                                             | (0,30)  | 0                                                                                                                                | 0       | 3       | 0       | 0       | 3       |
| Sum                                                                                                                                                                         |         | 8                                                                                                                                | 31      | 89      | 31      | 1       | N = 160 |

Note:  $S_1, S_2$ , status quo health levels of patients 1 and 2;  $e_1, e_2$ , effectiveness factors of patients 1 and 2;  $q$ , available units of treatment time.

Situations 10 and 12: Calculation of hit rates and areas of prediction

|                                         | # hits | Hit rate ( $r = \frac{\#hits}{N}$ ) | Area of prediction ( $a$ ) | Measure of predictive success ( $m = r - a$ ) |
|-----------------------------------------|--------|-------------------------------------|----------------------------|-----------------------------------------------|
| Focus on lower effectiveness            | 75     | 0.4688                              | 21/49 = 0.4000             | 0.0688                                        |
| Focus on stronger effectiveness         | 41     | 0.2563                              | 21/49 = 0.4000             | -0.1438                                       |
| Contextual irrelevance of effectiveness | 44     | 0.2750                              | 7/49 = 0.2000              | 0.0750                                        |
